# Supplementary material for: Unique cellulose/polydimethylsiloxane blends as an advanced hybrid material for organic solvent nanofiltration and pervaporation membranes
Source: Royal Society of Chemistry journal article supplement (doi:10.1039/c8ta02697a), 2018-01-01
Supplement: c8ta02697a1.pdf [file c8ta02697a1.pdf]

## Supporting Information

### Unique Cellulose/Polydimethylsiloxane Blends as Advanced Hybrid Material for Organic Solvent Nanofiltration and Pervaporation Membranes

Tiara Puspasari, Tina Chakrabarty, Giuseppe Genduso, Klaus-Viktor Peinemann

Advanced Membranes and Porous Material Research Center  
4700 King Abdullah University of Science and Technology (KAUST), Thuwal 23955-6900,  
Kingdom of Saudi Arabia.

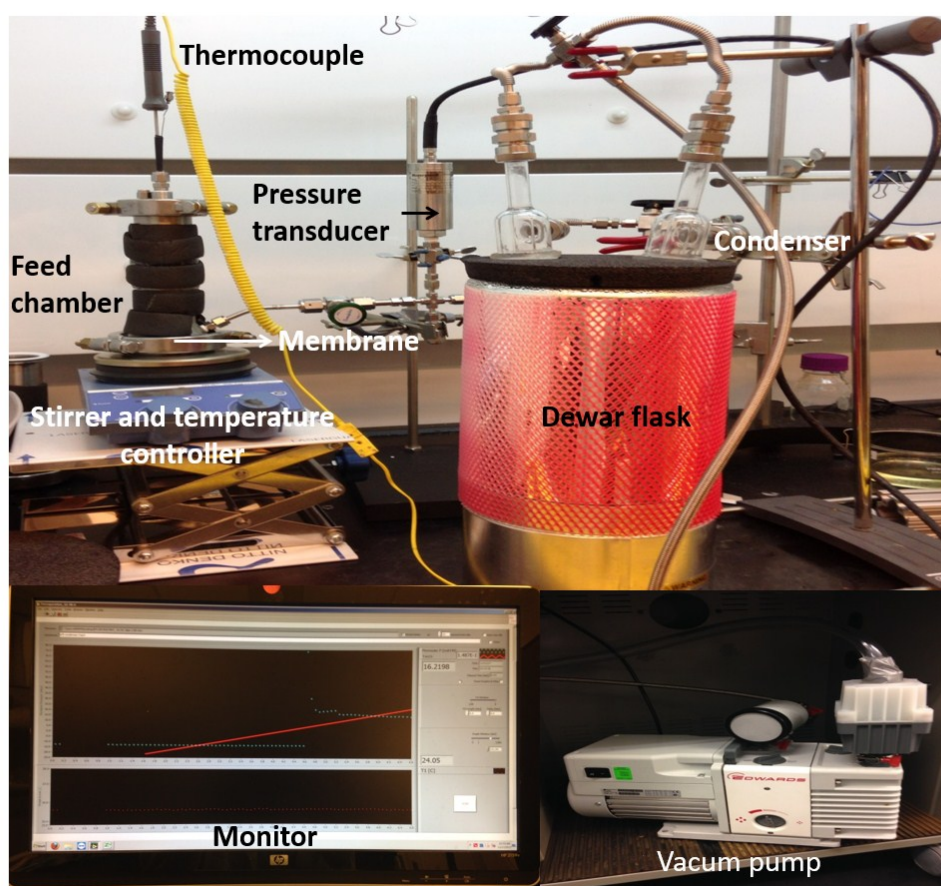

Figure S1 Pervaporation setup.

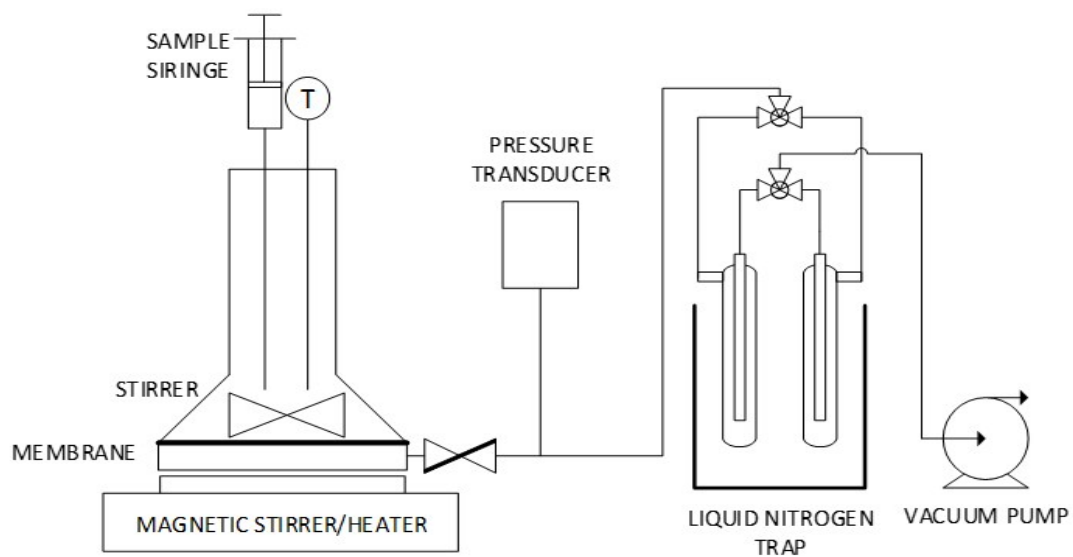

**Figure S2** Schematic of pervaporation setup.

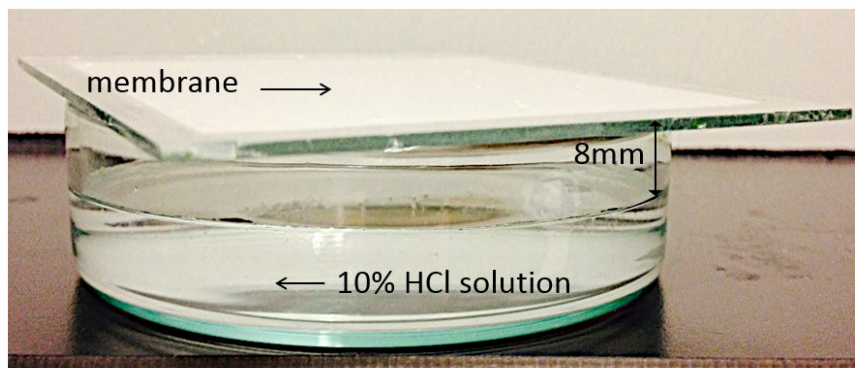

**Figure S3** Vapor-phase hydrolysis of TMSC using hydrochloric acid.

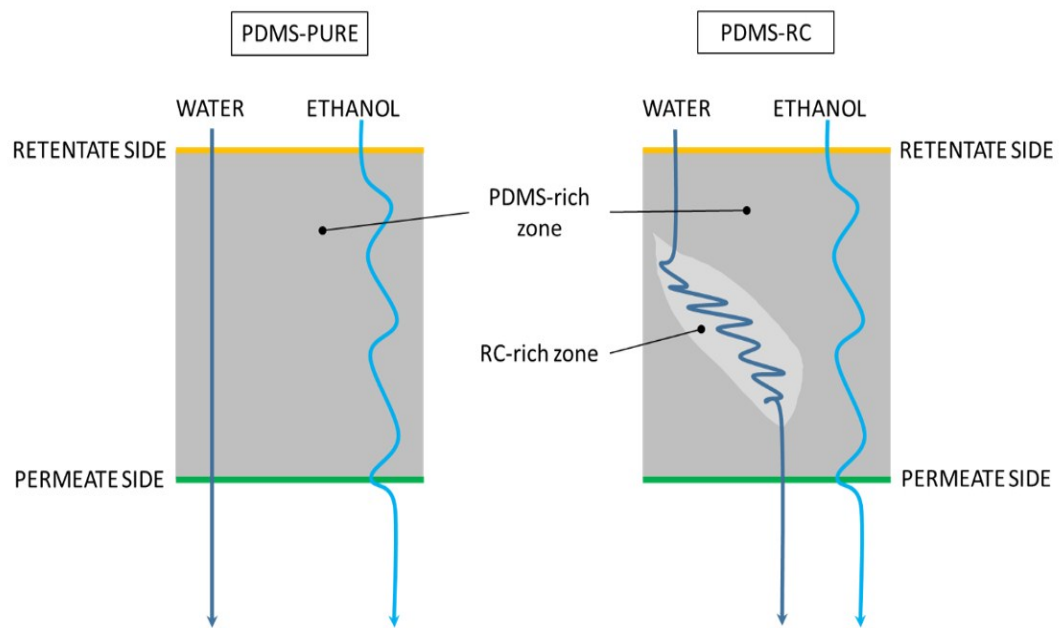

**Figure S4** Water and ethanol diffusion paths in a PDMS and PDMS-RC blend membrane.
